# Supplementary material for: Deep immunological imprinting due to the ancestral spike in the current bivalent COVID-19 vaccine
Source: PubMed Central journal article supplement — Cell Rep Med. 2023 Oct 30;4(11):101258. doi: 10.1016/j.xcrm.2023.101258 (PMC10694617; doi:10.1016/j.xcrm.2023.101258), 2023-10-30
Supplement: mmc1.pdf [file mmc1.pdf]

**Cell Reports Medicine, Volume 4**

**Supplemental information**

**Deep immunological imprinting  
due to the ancestral spike  
in the current bivalent COVID-19 vaccine**

**Qian Wang, Yicheng Guo, Anthony R. Tam, Riccardo Valdez, Aubree Gordon, Lihong Liu, and David D. Ho**

SUPPLEMENTAL INFORMATION TITLES AND LEGENDS

Table S1. Demographics of clinical cohorts. See also Figure 1.

| Sample ID                           | Vaccine type and infected strain                | Days post-vaccination or *infection | Confirmed COVID-19 | Age | Gender |
|-------------------------------------|-------------------------------------------------|-------------------------------------|--------------------|-----|--------|
| <i>4-dose monovalent</i>            |                                                 |                                     |                    |     |        |
| UM-65                               | BNT162b2/BNT162b2/BNT162b2/BNT162b2             | 24                                  | No                 | 52  | Female |
| UM-66                               | BNT162b2/BNT162b2/BNT162b2/BNT162b2             | 20                                  | No                 | 57  | Female |
| UM-67                               | BNT162b2/BNT162b2/BNT162b2/BNT162b2             | 20                                  | No                 | 61  | Female |
| UM-68                               | mRNA-1273/mRNA-1273/mRNA-1273/mRNA-1273         | 22                                  | No                 | 48  | Female |
| UM-69                               | BNT162b2/BNT162b2/BNT162b2/BNT162b2             | 23                                  | No                 | 50  | Female |
| UM-70                               | BNT162b2/BNT162b2/BNT162b2/BNT162b2             | 22                                  | No                 | 50  | Female |
| UM-71                               | BNT162b2/BNT162b2/BNT162b2/BNT162b2             | 20                                  | No                 | 58  | Female |
| UM-72                               | BNT162b2/BNT162b2/BNT162b2/BNT162b2             | 26                                  | No                 | 56  | Female |
| UM-73                               | BNT162b2/BNT162b2/BNT162b2/BNT162b2             | 29                                  | No                 | 63  | Female |
| UM-74                               | BNT162b2/BNT162b2/BNT162b2/BNT162b2             | 25                                  | No                 | 58  | Female |
| UM-75                               | BNT162b2/BNT162b2/BNT162b2/BNT162b2             | 21                                  | No                 | 62  | Male   |
| UM-76                               | BNT162b2/BNT162b2/BNT162b2/BNT162b2             | 26                                  | No                 | 54  | Female |
| UM-77                               | BNT162b2/BNT162b2/BNT162b2/BNT162b2             | 23                                  | No                 | 53  | Male   |
| UM-78                               | BNT162b2/BNT162b2/BNT162b2/BNT162b2             | 21                                  | No                 | 55  | Female |
| UM-79                               | BNT162b2/BNT162b2/BNT162b2/BNT162b2             | 23                                  | No                 | 59  | Female |
| UM-80                               | BNT162b2/BNT162b2/BNT162b2/BNT162b2             | 21                                  | No                 | 49  | Female |
| UM-81                               | BNT162b2/BNT162b2/BNT162b2/BNT162b2             | 27                                  | No                 | 57  | Female |
| UM-82                               | BNT162b2/BNT162b2/BNT162b2/BNT162b2             | 27                                  | No                 | 55  | Female |
| Q97                                 | BNT162b2/BNT162b2/BNT162b2/BNT162b2             | 36                                  | No                 | 53  | Female |
| <i>3-dose monovalent + bivalent</i> |                                                 |                                     |                    |     |        |
| UM-36                               | BNT162b2/BNT162b2/BNT162b2/Moderna Bivalent     | 24                                  | No                 | 38  | Female |
| UM-37                               | BNT162b2/BNT162b2/BNT162b2/Moderna Bivalent     | 27                                  | No                 | 42  | Female |
| UM-39                               | mRNA-1273//mRNA-1273/mRNA-1273/Moderna Bivalent | 24                                  | No                 | 36  | Male   |
| UM-40                               | BNT162b2/BNT162b2/BNT162b2/Pfizer Bivalent      | 25                                  | No                 | 37  | Female |
| UM-43                               | BNT162b2/BNT162b2/BNT162b2/Pfizer Bivalent      | 25                                  | No                 | 49  | Female |
| UM-44                               | BNT162b2/BNT162b2/BNT162b2/Moderna Bivalent     | 25                                  | No                 | 37  | Female |
| UM-47                               | BNT162b2/BNT162b2/BNT162b2/Pfizer Bivalent      | 26                                  | No                 | 45  | Male   |
| UM-48                               | BNT162b2/BNT162b2/mRNA-1273/Moderna Bivalent    | 26                                  | No                 | 43  | Female |
| UM-51                               | mRNA-1273/mRNA-1273/mRNA-1273/Moderna Bivalent  | 29                                  | No                 | 32  | Female |
| UM-52                               | BNT162b2/BNT162b2/BNT162b2/Pfizer Bivalent      | 23                                  | No                 | 43  | Female |
| UM-53                               | BNT162b2/BNT162b2/BNT162b2/Pfizer Bivalent      | 26                                  | No                 | 43  | Female |
| UM-54                               | BNT162b2/BNT162b2/mRNA-1273/Moderna Bivalent    | 29                                  | No                 | 38  | Female |
| UM-55                               | BNT162b2/BNT162b2/BNT162b2/Moderna Bivalent     | 28                                  | No                 | 38  | Female |
| UM-56                               | BNT162b2/BNT162b2/mRNA-1273/Moderna Bivalent    | 27                                  | No                 | 36  | Female |
| UM-60                               | BNT162b2/BNT162b2/BNT162b2/Moderna Bivalent     | 30                                  | No                 | 24  | Female |
| Q101                                | mRNA-1273/mRNA-1273/mRNA-1273/Moderna Bivalent  | 30                                  | No                 | 32  | Female |
| Q102                                | BNT162b2/BNT162b2/mRNA-1273/Moderna Bivalent    | 23                                  | No                 | 39  | Male   |
| Q103                                | BNT162b2/BNT162b2/BNT162b2/Pfizer Bivalent      | 30                                  | No                 | 26  | Female |
| Q104                                | mRNA-1273/mRNA-1273/mRNA-1273/Pfizer Bivalent   | 30                                  | No                 | 27  | Female |
| Q105                                | BNT162b2/BNT162b2/BNT162b2/Pfizer Bivalent      | 23                                  | No                 | 23  | Male   |
| <i>BA.5 breakthrough</i>            |                                                 |                                     |                    |     |        |
| Q71                                 | mRNA-1273/mRNA-1273/BNT162b2/BA.5.2.1           | *29                                 | Yes                | 29  | Female |
| Q77                                 | BNT162b2/BNT162b2/BNT162b2/BA.5                 | *22                                 | Yes                | 61  | Female |
| Q79                                 | mRNA-1273/mRNA-1273/mRNA-1273/BA.5              | *15                                 | Yes                | 28  | Female |

| Sample ID              | Vaccine type and infected strain                 | Days post-vaccination or *infection | Confirmed COVID-19 | Age | Gender |
|------------------------|--------------------------------------------------|-------------------------------------|--------------------|-----|--------|
| Q80                    | mRNA-1273/mRNA-1273/mRNA-1273/BA.5               | *21                                 | Yes                | 24  | Female |
| Q81                    | BNT162b2/BNT162b2/BNT162b2/BA.5                  | *75                                 | Yes                | 35  | Female |
| Q82                    | BNT162b2/BNT162b2/mRNA-1273/BA.5                 | *63                                 | Yes                | 46  | Female |
| Q83                    | BNT162b2/BNT162b2/BNT162b2/BA.5                  | *28                                 | Yes                | 55  | Male   |
| Q84                    | BNT162b2/BNT162b2/BNT162b2/BA.5                  | *17                                 | Yes                | 57  | Female |
| UM-85                  | BNT162b2/BNT162b2/BNT162b2/BA.5                  | *29                                 | Yes                | 44  | Female |
| UM-86                  | BNT162b2/BNT162b2/mRNA-1273/BA.5                 | *29                                 | Yes                | 36  | Female |
| UM-87                  | BNT162b2/BNT162b2/BNT162b2/BNT162b2/BA.5         | *31                                 | Yes                | 54  | Female |
| UM-88                  | BNT162b2/BNT162b2/BNT162b2/BNT162b2/BA.5         | *28                                 | Yes                | 69  | Male   |
| UM-89                  | BNT162b2/BNT162b2/BNT162b2/BNT162b2/BA.5         | *42                                 | Yes                | 44  | Male   |
| UM-90                  | BNT162b2/BNT162b2/BNT162b2/BNT162b2/BA.5         | *28                                 | Yes                | 41  | Female |
| UM-91                  | BNT162b2/BNT162b2/BNT162b2/BNT162b2/BA.5         | *28                                 | Yes                | 44  | Female |
| UM-92                  | BNT162b2/BNT162b2/BNT162b2/BNT162b2/BA.5         | *31                                 | Yes                | 29  | Female |
| UM-93                  | BNT162b2/BNT162b2/BNT162b2/BNT162b2/BA.5         | *29                                 | Yes                | 48  | Female |
| UM-96                  | BNT162b2/BNT162b2/BNT162b2/BNT162b2/BA.5         | *33                                 | Yes                | 58  | Female |
| Q106                   | mRNA-1273/mRNA-1273/mRNA-1273/mRNA-1273/BA.5     | *18                                 | Yes                | 32  | Female |
| <i>BQ breakthrough</i> |                                                  |                                     |                    |     |        |
| BQ-1                   | BNT162b2/BNT162b2/BNT162b2/BNT162b2/mRNA-1273/BQ | *33                                 | Yes                | 53  | Female |
| BQ-2                   | BNT162b2/BNT162b2/BNT162b2/mRNA-1273/BQ          | *30                                 | Yes                | 32  | Female |
| BQ-3                   | BNT162b2/BNT162b2/BNT162b2/mRNA-1273/BQ          | *21                                 | Yes                | 35  | Female |
| BQ-4                   | BNT162b2/BNT162b2/mRNA-1273/BQ                   | *39                                 | Yes                | 52  | Female |
| BQ-5                   | BNT162b2/BNT162b2/BNT162b2/BNT162b2/mRNA-1273/BQ | *22                                 | Yes                | 62  | Female |
| BQ-6                   | BNT162b2/BNT162b2/mRNA-1273/BQ                   | *34                                 | Yes                | 29  | Female |
| BQ-7                   | BNT162b2/BNT162b2/BQ                             | *44                                 | Yes                | 35  | Female |
| BQ-8                   | mRNA-1273/mRNA-1273/mRNA-1273/mRNA-1273/BQ       | *59                                 | Yes                | 33  | Female |
| BQ-9                   | BNT162b2/BNT162b2/BNT162b2/BNT162b2/BQ           | *44                                 | Yes                | 45  | Female |
| BQ-10                  | JNJ-78436735/JNJ-78436735/BNT162b2/BNT162b2/BQ   | *32                                 | Yes                | 47  | Female |
| BQ-11                  | BNT162b2/BNT162b2/BNT162b2/BQ                    | *36                                 | Yes                | 36  | Female |
| BQ-12                  | BNT162b2/BNT162b2/BNT162b2/BNT162b2/BNT162b2/BQ  | *77                                 | Yes                | 59  | Female |
| BQ-13                  | BNT162b2/BNT162b2/BNT162b2/BNT162b2/BQ           | *25                                 | Yes                | 39  | Female |
| BQ-14                  | BNT162b2/BNT162b2/BNT162b2/BNT162b2/BQ           | *67                                 | Yes                | 43  | Female |

**Table S2. Summary of clinical cohorts. See also Figure 1.**

| <b>Characteristic</b>                               | <b>4-dose<br/>Monovalent<br/>(N=19)</b> | <b>3-dose monovalent +<br/>bivalent<br/>(N=20)</b> | <b>BA.5<br/>Breakthrough<br/>(N=19)</b> | <b>BQ<br/>Breakthrough<br/>(N=14)</b> |
|-----------------------------------------------------|-----------------------------------------|----------------------------------------------------|-----------------------------------------|---------------------------------------|
| <b>Sex - No. (%)</b>                                |                                         |                                                    |                                         |                                       |
| Female                                              | 17 (89.5%)                              | 16 (80.0%)                                         | 16 (84.2%)                              | 14 (100%)                             |
| Male                                                | 2 (10.5%)                               | 4 (20.0%)                                          | 3 (15.8%)                               | 0 (0%)                                |
| <b>Mean Age (range)-<br/>year</b>                   | 55.3 (48 - 63)                          | 36.4 (23 - 49)                                     | 43.9 (24 - 69)                          | 42.9 (29 - 62)                        |
| <b>Days post-<br/>vaccination<br/>or *infection</b> | 24.0                                    | 26.5                                               | *31.4                                   | *40.2                                 |

\*For the BA.5 breakthrough cohort, days are measured between last dose of vaccine and documented breakthrough infection.

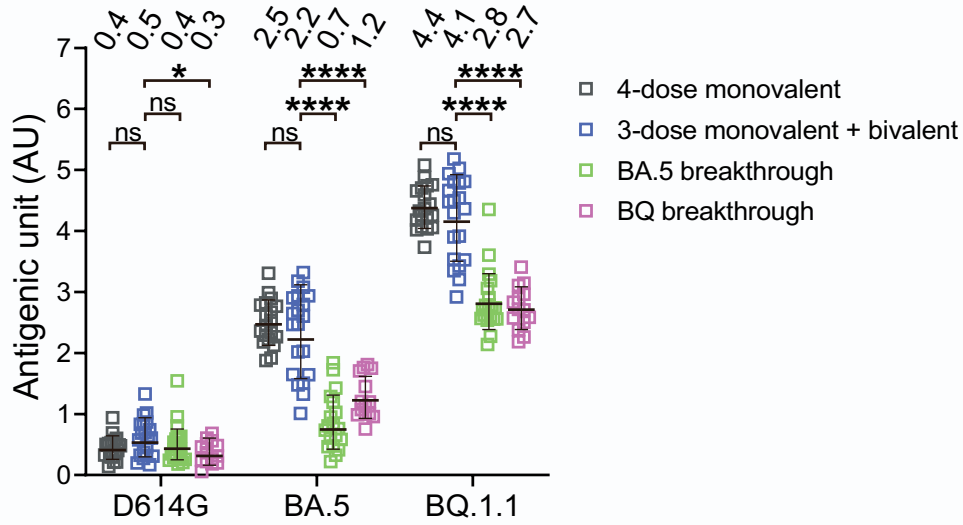

**Figure S1. Antigenic units from D614G, BA.5, and BQ.1.1 to the serum samples in the “4-dose monovalent”, “3-dose monovalent + bivalent”, “BA.5 breakthrough” and “BQ breakthrough” cohorts.** Data were generated based on the neutralization data from Figure 1. One AU corresponds to a two-fold serum dilution of the neutralization titer. Mann-Whitney test was used to compare the results for the “3-dose monovalent + bivalent cohort”. ns, not significant; \* $p < 0.05$ ; \*\*\*\* $p < 0.0001$ . See also Figure 2.
